# Supplementary material
Source: PubMed Central journal article supplement (PMC4775108)
Supplement: supp_pp.15.01216_01216suppdata.pdf [file supp_pp.15.01216_01216suppdata.pdf]

```

TaTOC-A1 HVGAGEGVRAGCSGAGVGG...COPVDRSRVILLCDSDPSSRRVLRLLCNCSYQVTCAKSPROVINMLNLF 71
TaTOC-B1 HVGAGEGVRAGCSGAGVGG...COPVDRSRVILLCDSDPSSQVLRLLCNCSYQVTCAKSPROVINMLNLF 71
TaTOC-D1 HVGAGEGVRAGCSGAGVGGAGAGCOPVDRSRVILLCDSDPSSQVLRLLCNCSYQVTCAKSPROVINMLNLF 75
OsTOC1 HVGAGEGDRVGGGAAVGGE...COPVDRSRVILLCDSDPSSRRVLRLLCNCSYQVTCAKSPROVINMLNLF 70
TOC1 ...MDLNGECKG...DGGHDSRVILLCDNDSTSLGCVYTLISECSYQVTAVKAROVINDANLAF 61

TaTOC-A1 GAEIDHILAEVDLPVSRGFRHNYTGRRRLRHPHHSNRDEVSVVVRCRLGGAELVLPKLRNELLNLUH 146
TaTOC-B1 GAEIDHILAEVDLPVSRGFRHNYTGRRRLRHPHHSNRDEVSVVVRCRLGGAELVLPKLRNELLNLUH 146
TaTOC-D1 GAEIDHILAEVDLPVSRGFRHNYTGRRRLRHPHHSNRDEVSVVVRCRLGGAELVLPKLRNELLNLUH 150
OsTOC1 AGEIDHILAEVDLPVSRGFRHNYTGRRRLRHPHHSNRDEVSVVVRCRLGGAELVLPKLRNELLNLUH 145
TOC1 SFDIDHILAEVDLPVSRGFRHNYTGRRRLRHPHHSNRDEVSVVVRCRLGGAELVLPKLRNELLNLUH 136

TaTOC-A1 VURRRRLGLAEKNFFIDNLEVLSEFSDANTNSTLLSDETDKPKRGNRHETNTSSQHEYES..PAMDPPKTD 219
TaTOC-B1 VURRRRLGLAEKNFFIDNLEVLSEFSDANTNSTLLSDETDKPKRGNRHETNTSSQHEYES..PAMDPPKTD 219
TaTOC-D1 VURRRRLGLAEKNFFIDNLEVLSEFSDANTNSTLLSDETDKPKRGNRHETNTSSQHEYES..PAMDPPKTD 223
OsTOC1 VURRRRLGLAEKNFFIDNLEVLSEFSDANTNSTLLSDDTDKPKRGNRHETNTSSQHEYESNPSDAEPKQKG 220
TOC1 VURRRRLGLAEKNMLSYDFDLVGSDCSDPNNSTLLSDDTDRSLRSTNQRGNLSHQCNMWSVATPVHARD 211

TaTOC-A1 .....QVENMP.SIAEDDDKASPGGMPSPRHKINLRVIAESSAFLATVKSSTPANNPLDN 273
TaTOC-B1 .....KLEMP.SIAEDDDKASPGGMPSPRHKINLRVIAESSAFLATVKSSTPANNPLDN 273
TaTOC-D1 .....QLEMP.SIAEDDDKASPGGMPSPRHKINLRVIAESSAFLATVKSSTPANNPLDN 277
OsTOC1 .....TPEGLLVSTEGGDAQSPGVHFSRPHKINLRVIAESSAFLATVKSSTPTTTSFDS 274
TOC1 GGLGAGDTATSSLAUTAIEPPLDLVAGSHHPKRNENPQFSSAPRKRSLKIGESSAFPTVYKSTVLRNQQGP 286

TaTOC-A1 EIQREGNQIDVMDHGNFSGATRIDTNSSINIQ...DEAFETFPVQVPLVCFSSSNLHLEQ..... 332
TaTOC-B1 EIQREGNQIDVMDHGNFSGATERIDTNSSINIQ...DEAFETFPVQVPLVCFSSSNLHLEQ..... 332
TaTOC-D1 EIQREGNQIDVMDHGNFSGATRIDTNKINIQ...DEAFETFPVQVPLVCFSSSNLHLEQ..... 336
OsTOC1 EIQREGNRLDSSDRGNFSSITRDSDTCTDVNIR...DEAFETFPVQVPLVCFSSSNLHLEQ..... 333
TOC1 PIVDNGSLHLHRLAEKFOVASEGINNTKQARRATPKSTVLRNCGDEPLVNGSGSHHHRGAAEKFOVASE 361

TaTOC-A1 .....RNEQQQDVSGNPPVYHYFFYYPGNVHEGHALHSVQSFQG.NINTAQAHPTMLHQYNVYHCSHGA 397
TaTOC-B1 .....RNEQQQDVSGNPPVYHYFFYYPGNVHEGHALHSVQSFQG.NINTAQAHPTMLHQYNVYHCSHGA 397
TaTOC-D1 .....RNEQQQDVSGNPPVYHYFFYYPGNVHEGHTLHSVQSFQG.NINTAQAHPTMLHQYNVYHCSHGA 401
OsTOC1 .....SNEGQNDASGTPPVYHYFFYYPGNMDHGHTHPVQNFQG.NINNAQVHTPTLLPQYNVYHCSHGV 398
TOC1 GINNTKQAHRSRTEQYHSQGETLQNGASYHSLERSRTLPTSMESKRNLYOEGNHNHQQVAMNRSKSSQVDS 436

TaTOC-A1 SMOSS.....YOYSPAGMNVHSSHLSTQN..... 420
TaTOC-B1 SMOSS.....YOYSPAGMNVHSSHLSTQN..... 420
TaTOC-D1 SMOSS.....YRYSFAGMNVHSSHLSTQN..... 424
OsTOC1 SMNPP.....FOYMPAGHSIQSNOLPTQN..... 422
TOC1 GFSAPNAYPYHMGVNMVHMQSAAMPQYGHQIPHCQPNHPNGHTGYPYHHEMNTSLOHSQHSLOQGNHSVH 511

TaTOC-A1 .VUSVSSSTPIPERHSRSGRRALAKFRKRRNRCFDKRVYVNRKRVAEIRPRVVGQFVROASNTDIIITG. 493
TaTOC-B1 .VUSVSSSTPIPERHSRSGRRALAKFRKRRNRCFDKRVYVNRKRVAEIRPRVVGQFVROASNTDIIITG. 493
TaTOC-D1 .VUSVSSSTPIPERHSRSGRRALAKFRKRRNRCFDKRVYVNRKRVAEIRPRVVGQFVROASNTDIIITG. 497
OsTOC1 .MUPQASSTPIPERHSRSGRRALAKFRKRRNRCFDKRVYVNRKRVAEIRPRVVGQFVROASNTDIIITG. 495
TOC1 HSUSFAGNPSMIVRVNKLDRREBALKFRKRRNRCFDKRVYVNRKRVAEIRPRVVGQFVROASNTDIIITG. 586

TaTOC-A1 ...DDISEYEDDDPSSRDVELVSSFE..... 516
TaTOC-B1 ...DDISEYEDDDPSSRDVELVSSFE..... 516
TaTOC-D1 ...DDISEYEDDDPSSRDVELVSSFE..... 520
OsTOC1 ...DDISEYEDDDPSSREVEVYSSFE..... 518
TOC1 PDSADYDDEEEEEEEEEHRSFPQDLAG 617

```

**Supplemental Figure 1.** Alignment of the Amino Acid Sequences of TaTOC-A1, TaTOC-B1, TaTOC-D1, TOC1 (*Arabidopsis thaliana*, NP\_200946), and OsTOC1 (*Oryza sativa*, BAD38854).

Identical amino acid residues are shaded in black, and similar amino acid residues are shaded in gray. Dots denote gaps introduced by the DNAMAN program. Two conserved regions, the pseudo-receiver domain at the N-terminal region and CCT (CO, COL, and TOC1) domain at the C-terminus, are underlined.

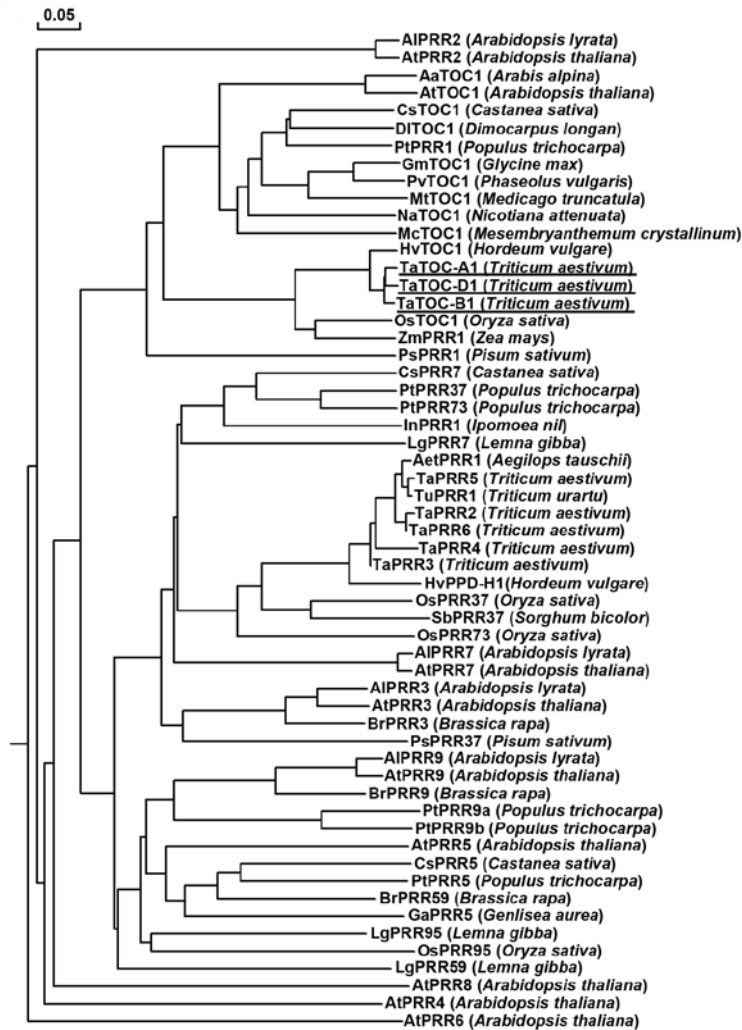

**Supplemental Figure 2.** Phylogenetic tree of deduced amino acid sequences of PRR in Some Plant Species.

The proteins analyzed were as follows: TaTOC-A1 (underlined) (*Triticum aestivum*), TaTOC-B1 (underlined) (*Triticum aestivum*), TaTOC-D1 (underlined) (*Triticum aestivum*), AaTOC1 (*Arabis alpina*, KFK27896), AetPRR1 (*Aegilops tauschii*, ABL09481), AIPRR2 (*Arabidopsis lyrata subsp. Lyrata*, XP\_002868017), AIPRR3 (*Arabidopsis lyrata subsp. Lyrata*, XP\_002866368), AIPRR7 (*Arabidopsis lyrata subsp. Lyrata*, XP\_002873067), AIPRR9 (*Arabidopsis lyrata subsp. Lyrata*, XP\_002880264), AtPRR2 (*Arabidopsis thaliana* NP\_567548), AtPRR3 (*Arabidopsis thaliana*, BAB13744), AtPRR4 (*Arabidopsis thaliana*, NP\_199735), AtPRR5 (*Arabidopsis thaliana*, BAB13743), AtPRR6 (*Arabidopsis thaliana*, NP\_176988), AtPRR7 (*Arabidopsis thaliana*, BAB13742), AtPRR8 (*Arabidopsis thaliana*, O23100), AtPRR9 (*Arabidopsis thaliana*, BAB13741);

AtTOC1 (*Arabidopsis thaliana*, NP\_200946), BrPRR3 (*Brassica rapa*, NP\_001288859), BrPRR9 (*Brassica rapa*, NP\_001288875), CsPRR5 (*Castanea sativa*, ABV53464), CsPRR7 (*Castanea sativa*, ABV53463), CsTOC1 (*Castanea sativa*, AAU20772); DITOC1 (*Dimocarpus longan*, AIT56195), GaPRR5 (*Genlisea aurea*, EPS67215), GmTOC1 (*Glycine max*, ABW87010), HvPpd-H1 (*Hordeum vulgare*, AAY42111); HvTOC1 (*Hordeum vulgare*, BAK01373), InPRR1 (*Ipomoea nil*, BAO57288), LgPRR37 (*Lemna gibba*, BAE72700), LgPRR59 (*Lemna gibba*, BAE72701), LgPRR95 (*Lemna gibba*, BAE72702); McTOC1 (*Mesembryanthemum crystallinum*, AAQ73525); MtTOC1 (*Medicago truncatula*, KEH33445), NaTOC1 (*Nicotiana attenuate*, AFA35965), OsPRR37 (*Oryza sativa*, BAD38855), OsPRR73 (*Oryza sativa*, BAD38856), OsPRR95 (*Oryza sativa*, BAD38857); OsTOC1 (*Oryza sativa*, BAD38854), PsPRR1 (*Pinus sylvestris*, AFV78751), PsPRR37 (*Pinus sylvestris*, ACU42263), PsPRR59 (*Pinus sylvestris*, ACU42265), PtPRR1 (*Populus trichocarpa*, AID51407), PtPRR5 (*Populus trichocarpa*, XP\_002321349), PtPRR5a (*Populus trichocarpa*, AID51409), PtPRR5b (*Populus trichocarpa*, AID51410), PtPRR9a (*Populus trichocarpa*, AID51412), PtPRR9b (*Populus trichocarpa*, XP\_002320232), PtPRR37 (*Populus trichocarpa*, AID51408), PtPRR73 (*Populus trichocarpa*, AID51411), PvTOC1 (*Phaseolus vulgaris*, AEA92684), SbPRR37 (*Sorghum bicolor*, AGN92441), TaPRR2 (*Triticum aestivum*, ABL09470), TaPRR3 (*Triticum aestivum*, BAL63649), TaPRR4 (*Triticum aestivum*, BAM31260), TaPRR5 (*Triticum aestivum*, ABL09464), TaPRR6 (*Triticum aestivum*, ABL09468), TuPRR1 (*Triticum urartu*, BAM93402), ZmPRR1 (*Zea mays*, ADU60098). The phylogenetic tree was constructed using MEGA4.0 software. The length of the branch line indicates the extent of the difference according to the scale on the upper left.

|                                                                                                          |  | Mismatch number |
|----------------------------------------------------------------------------------------------------------|--|-----------------|
| 5'... TCGAGGCAAGACGAAGTCCCT ... 3' <i>AtTOC1</i><br>3'... CGGUCCCUUCUCCGUCACGUA ... 5' <i>AtmiR408</i>   |  | 7               |
| 5'... GTTAGGCAGGCAGGCAATGCAG ... 3' <i>BdPRR1</i><br>3'... CGGUCCCUUC·UCCGUCACGUC ... 5' <i>BdmiR408</i> |  | 5.5             |
| 5'... GTTGGGATGGAAGTTATGCAT ... 3' <i>GmTOC1</i><br>3'... CGGUCCCUUCUCCGUCACGUA ... 5' <i>GmmiR408</i>   |  | 9               |
| 5'... GTGGGGGCAGGGGCAGGGCA ... 3' <i>HvTOC1</i><br>3'... CGGUCCCUUCUCCGUCACGU ... 5' <i>HvmiR408</i>     |  | 5               |
| 5'... GCCAGGAACAAGGAATTGCGC ... 3' <i>OsPRR1</i><br>3'... CGGUCCCUUCUCCGUCACGUC ... 5' <i>OsmiR408</i>   |  | 6.5             |
| 5'... ATCAAGAAACAGGCACCTCAA ... 3' <i>ZmTOC1</i><br>3'... CGGUCCCUUCUCCGUCACGUC ... 5' <i>ZmmiR408</i>   |  | 9               |

**Supplemental Figure 3.** Predication of miR408 Targets in a Number of Plant Species.

These plants include *Aarabidopsis thaliana* (At), *Brachypodium distachyon* (Bd), *Glycine max* (Gm), *Hordeum vulgare* (Hv), *Oryza sativa* (Os), and *Zea mays* (Zm).



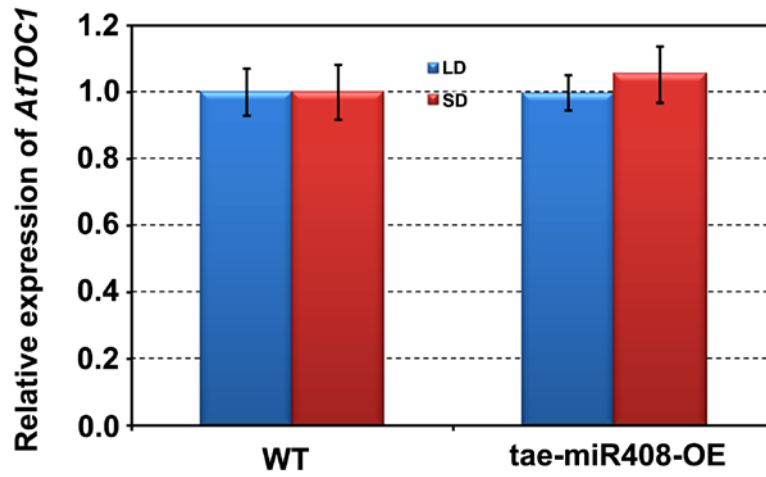

**Supplemental Figure 5.** Expression of *AtTOC1* in Transgenic *Arabidopsis* Overexpressing tae-miR408 (tae-miR408-OE).

LD, long days; SD, short days; WT, wild type.

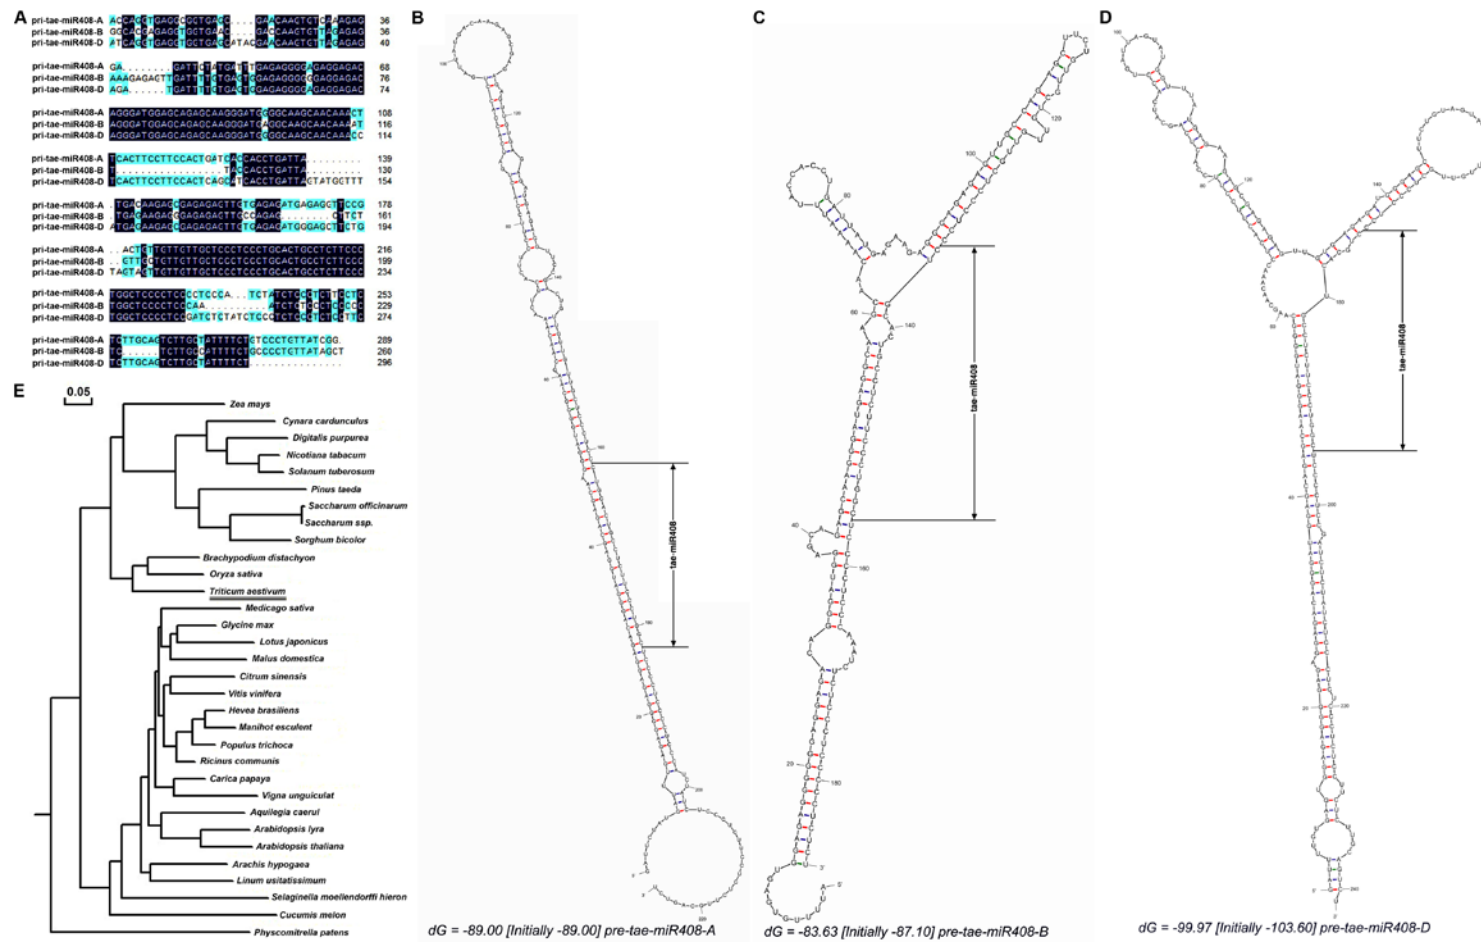

**Supplemental Figure 6.** Identification of tae-miR408 and Phylogenetic Analysis among miR408s in Various Species.

(A) Alignment of the primary transcript sequences of pri-tae-miR408a, pri-tae-miR408b, and pri-tae-miR408d. Identical nucleotide bases are

shaded in black, and similar ones are shaded in blue. Dots denote gaps introduced by the DNAMAN program.

**(B)-(D)** Stem-loop structure of three tae-miR408 precursors predicted using the mfold web server (<http://mfold.rna.albany.edu/?q=mfold>).

**(E)** Phylogenetic tree of tae-miR408 (double underlined) with miR408 from other plants species. The miR408 sequences from 32 species were aligned using DNAMAN software (version 7), and the phylogenetic tree was constructed using the maximum likelihood (ML) method, with 1000 bootstrap replicates.



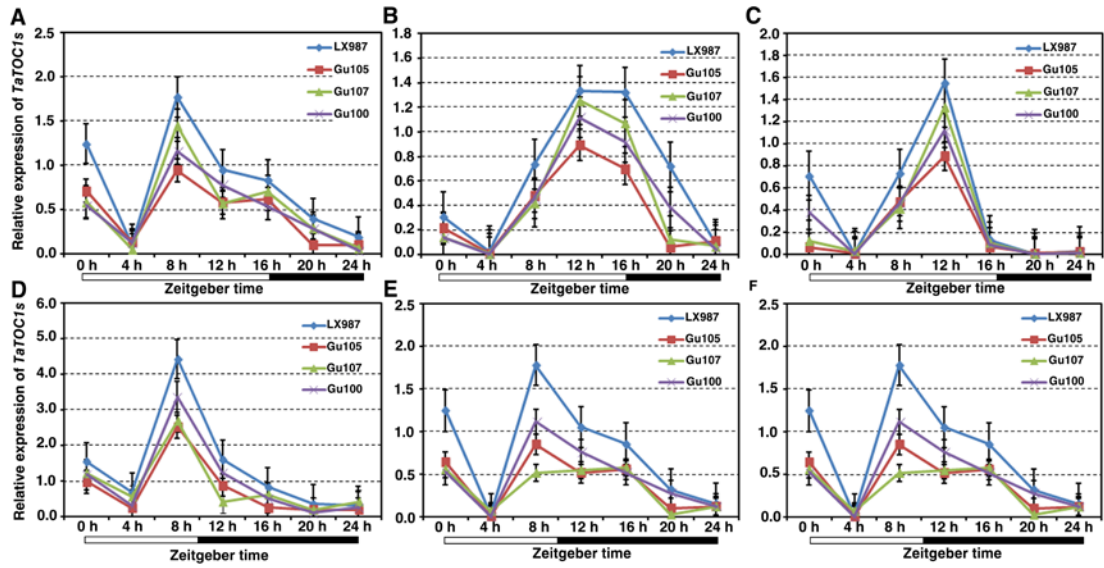

**Supplemental Figure 7.** Expression of *TaTOC-A1*(A and D), *TaTOC-B1*(B and E), and *TaTOC-D1*(C and F) in Transgenic Wheat Overexpressing tae-miR408.

The white and black boxes at the bottom of each graph represent light and dark periods, respectively. Data are the mean  $\pm$  s.e.m.

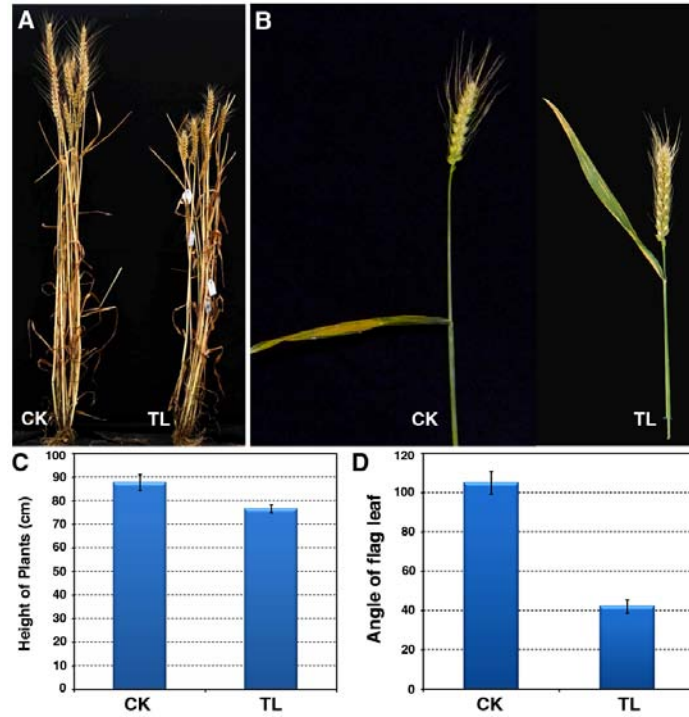

**Supplemental Figure 8.** Comparison of the Plant Heights (A and C) and Flage Leaf Angle (B and D) between the Transgenic Wheat Overexpressing *tae-miR408* (TL) and Controls (CK).

Error bars indicate standard errors of the means (n=10).

**Supplemental Table 1.** Comparison of cDNA Sequence Identity (%) of *TaTOC-A1*, *TaTOC-B1*, and *TaTOC-D1*

| cDNA identity (%) | <i>TaTOC-A1</i> | <i>TaTOC-B1</i> | <i>TaTOC-D1</i> |
|-------------------|-----------------|-----------------|-----------------|
| <i>TaTOC-A1</i>   | ---             | 96.0            | 93.8            |
| <i>TaTOC-B1</i>   | 96.0            | ---             | 94.3            |
| <i>TaTOC-D1</i>   | 93.8            | 94.3            | ---             |

**Supplemental Table 2.** Main Regulatory Motifs Found within the Promoter Sequences of the Three *TaTOC1* Genes (about 1000bp Upstream of the ATG Initiation Codon of Each Homoeolog)

| Motif Name | Motif Functions                                            | Motif Number    |                 |                 |
|------------|------------------------------------------------------------|-----------------|-----------------|-----------------|
|            |                                                            | <i>TaTOC-A1</i> | <i>TaTOC-B1</i> | <i>TaTOC-D1</i> |
| ABRE       | Abscisic acid responsiveness                               | 4               | 6               | 4               |
| ACE        | Light responsiveness                                       | 0               | 1               | 0               |
| CAAT-box   | Common cis-acting element in promoter and enhancer regions | 6               | 3               | 5               |
| EE         | Essential for circadian rhythmicity                        | 1               | 1               | 1               |
| G-box      | Light responsiveness                                       | 1               | 3               | 1               |
| MBS        | MYB binding site                                           | 1               | 1               | 1               |
| Motif IIb  | Abscisic acid responsiveness                               | 1               | 1               | 1               |
| Sp1        | Light responsive element                                   | 7               | 6               | 7               |
| TATA-box   | Core promoter element around -30 of transcription start    | 0               | 1               | 0               |

**Supplemental Table 3.** Primers Used in This Study

| Primer Name    | Primer Sequence (5'-3')                                      | Objective                                                                                                         |
|----------------|--------------------------------------------------------------|-------------------------------------------------------------------------------------------------------------------|
| TaTRNi-F       | GGGGTACC <u>ACTAGT</u> TGCAGTATCCTTTGGTA<br><i>KpnI SpeI</i> | For RNA interference vector construction, southern blotting and In situ hybridization                             |
| TaTRNi-R       | CGGGATCCGAGCTC <u>GCAACTTTCTTCCGATT</u><br><i>BamHI SacI</i> | For RNA interference vector construction, southern blotting, In situ hybridization and transgenic wheat detection |
| tae-MIR408b-F1 | CTGGATCCGAGAGAAAGAGAGTTGATTTTGTGAG<br><i>BamHI</i>           | For overexpression vector construction and wheat transformation                                                   |
| tae-MIR408b-R1 | TTGGTACCCTATAACAGGGGCAGAAAATGG<br><i>KpnI</i>                |                                                                                                                   |
| TaTOC-A1F1     | ATGGTGGGCGCCGGC                                              | For the amplification of the full length TaTOC-A1 cDNA and Arabidopsis overexpression vector construction         |
| TaTOC-A1R1     | TTCTGGTGAAGAAACCAACTCAAC                                     |                                                                                                                   |

|                |                             |                                                                                                           |
|----------------|-----------------------------|-----------------------------------------------------------------------------------------------------------|
| TaTOC-B1F1     | ATGGTGGGCGCCGG              | For the amplification of the full length TaTOC-B1 cDNA and Arabidopsis overexpression vector construction |
| TaTOC-B1R1     | CTCTGGTGAAGAAACCAACTCAAC    |                                                                                                           |
| TaTOC-D1F1     | ATGGTGGGCGCCGGCGAGG         | For the amplification of the full length TaTOC-D1 cDNA and Arabidopsis overexpression vector construction |
| TaTOC-D1R1     | CTCTGGTGAAGAAACCAACTCAACGTC |                                                                                                           |
| tae-MIR408b-F2 | GAGAGAAAGAGAGTTGATTTTGTGAG  | For overexpression vector construction, Arabidopsis transformation                                        |
| tae-MIR408b-R2 | CTATAACAGGGGCAGAAAATGG      |                                                                                                           |
| pTCK303-F      | CTCTAACCTTGAGTACCTATC       | For transgenic plants detection                                                                           |
| pTCK303-D      | CTATGACACGGCTGTTTCGAG       | For transgenic plants detection                                                                           |
| TaTOC-A1F2     | ACCGACAGAATCGACACTAATG      | For <i>TaTOC-A1</i> expression analysis with RT-PCR                                                       |
| TaTOC-A1R2     | GGATGGATCATCGTCTTCG         |                                                                                                           |

|            |                            |                                                           |
|------------|----------------------------|-----------------------------------------------------------|
| TaTOC-B1F2 | GGTGCGACCGAGAGAATA         | For <i>TaTOC-B1</i> expression analysis with RT-PCR       |
| TaTOC-B1R2 | CTAGATCATCCGCACACCAT       |                                                           |
| TaTOC-D1F2 | ACACTGCTCAAGCTCATAACG      | For <i>TaTOC-D1</i> expression analysis with RT-PCR       |
| TaTOC-D1R2 | TCATCCGCACACCACTC          |                                                           |
| TaActin-F  | AGTCGAGAACGATACCAGTAGTACGA | Used as internal reference                                |
| TaActin-R  | GCCATGTACGTCGCAATTCA       |                                                           |
| TaTOC1-a   | GCAGCACTTGCAAAATTCAG       | For three <i>TaTOC1s</i> expression analysis with qRT-PCR |
| TaTOC1-b   | GTGCTAATTATATCTGTGTTGCTTGC |                                                           |
| TaTOC-A1F3 | CCCCCAAACAGACCAATG         | For <i>TaTOC-A1</i> expression analysis with qRT-PCR      |
| TaTOC-A1R3 | CATAGGCGTCTCAAAGCTTC       |                                                           |
| TaTOC-B1F3 | CAATTCCCGAGGAAAGACAC       | For <i>TaTOC-B1</i> expression analysis with qRT-PCR      |
| TaTOC-B1R3 | AATGATCATCCGCACACCAT       |                                                           |

|                |                        |                                                       |
|----------------|------------------------|-------------------------------------------------------|
| TaTOC-D1F3     | GGTATCGAGCACACCAATTCT  | For <i>TaTOC-D1</i> expression analysis with qRT-PCR  |
| TaTOC-A1F3     | GCAATGATCATCCTCACTCCC  |                                                       |
| tae-MIR408b-F3 | GGATGGAGCAGAGCAAGG     | For <i>TaemiR408</i> expression analysis with qRT-PCR |
| tae-MIR408b-R3 | TGGCAACTCTCTCCCTCTTCTC |                                                       |
| TaCO1-F        | CAGACACCAATTCCTTCAGC   | For <i>TaCO1</i> expression analysis with qRT-PCR     |
| TaCO1-R        | TCCACTTCCATGTCTGCAT    |                                                       |
| TaFT1-F        | GTCGTTCGGGCAGGAG       | For <i>TaFT1</i> expression analysis with qRT-PCR     |
| TaFT1-R        | TGGAAGAGTACGAGCACGA    |                                                       |
| Tubulin2-F     | ATCCGTGAAGAGTACCCAGAT  | Used as internal reference                            |
| Tubulin2-R     | AAGAACCATGCACTCATCAGC  |                                                       |
| AtTOC1 F       | TCACCATGAGCCAATGAAAA   | For <i>AtTOC1</i> expression analysis with qRT-PCR    |
| AtTOC1 R       | TTGAAACTTCTCCGCCAAAC   |                                                       |



|                |                                                               |                                                                                        |
|----------------|---------------------------------------------------------------|----------------------------------------------------------------------------------------|
| LAD1-4         | ACGATGGACTCCAGAG(G/C/T)(G/A/T)N(G/C/T)NNNC<br>GGT             |                                                                                        |
| AC1            | ACGATGGACTCCAGAG                                              |                                                                                        |
| TP-0           | CTTGGTAGGAGCAGTTGCAGAGGAGG                                    | For hiTAIL-PCR                                                                         |
| TP-1           | ACGATGGACTCCAGTCCGGGAGGAGGCGAAGCACA<br>TCCYGTGAGC             |                                                                                        |
| TP-2           | CCGGCGCCCACCATACCCAA                                          |                                                                                        |
| AAP            | GGCCACGCGTCGACTAGTACGGGIIIGGGIIGGGIIG                         |                                                                                        |
| AUAP           | GGCCACGCGTCGACTAGTAC                                          |                                                                                        |
| GSP1           | CWATCTGATTACCCT                                               | For 5' RACE                                                                            |
| GSP2           | CGAAAGGAGTGTGGTGCTATTG                                        |                                                                                        |
| GSP3           | CATCCGTCTYCTTCGCCAS                                           |                                                                                        |
| tae-MIR408b-F4 | TAT <u>CTAGAG</u> AGAGAAAGAGAGTTGATTTTGTGAGTG<br><i>Xba</i> I | For tobacco leaf co-transformation assays of the<br>tae-miR408 and <i>TaTOC1</i> genes |

---

tae-MIR408b-R4 ATCCCCGGGCTATAACAGGGGCAGAAAATGGC  
*Sma*I

TaTOC-A1F4 TATCTAGAATGGTGGGCGCCGGC  
*Xba*I

TaTOC-A1R4 ATCCCCGGGTTCTGGTGAAGAAACCAACTCAAC  
*Sma*I

TaTOC-B1F4 TATCTAGAATGGTGGGCGCCGG  
*Xba*I

TaTOC-B1R4 ATCCCCGGGCTCTGGTGAAGAAACCAACTCAAC  
*Sma*I

TaTOC-D1F4 TATCTAGAATGGTGGGCGCCGGCGAGG  
*Xba*I

TaTOC-D1R4 ATCCCCGGGCTCTGGTGAAGAAACCAACTCAACGTC  
*Sma*I

---
